# Supplementary material for: Construction of diverse CdII/ZnII coordination polymers based on 5-(quinolyl)tetrazolate generated via in situ hydrothermal synthesis
Source: Royal Society of Chemistry journal article supplement (doi:10.1039/c2ce26323h), 2012-11-27
Supplement: c2ce26323h.pdf [file c2ce26323h.pdf]

## Supporting Information

### Construction of diverse Cd<sup>II</sup>/Zn<sup>II</sup> coordination polymers based on 5-(quinolyl)tetrazolate generated via *in situ* hydrothermal synthesis

Li Ma, Naiqian Yu, Susu Chen, and Hong Deng

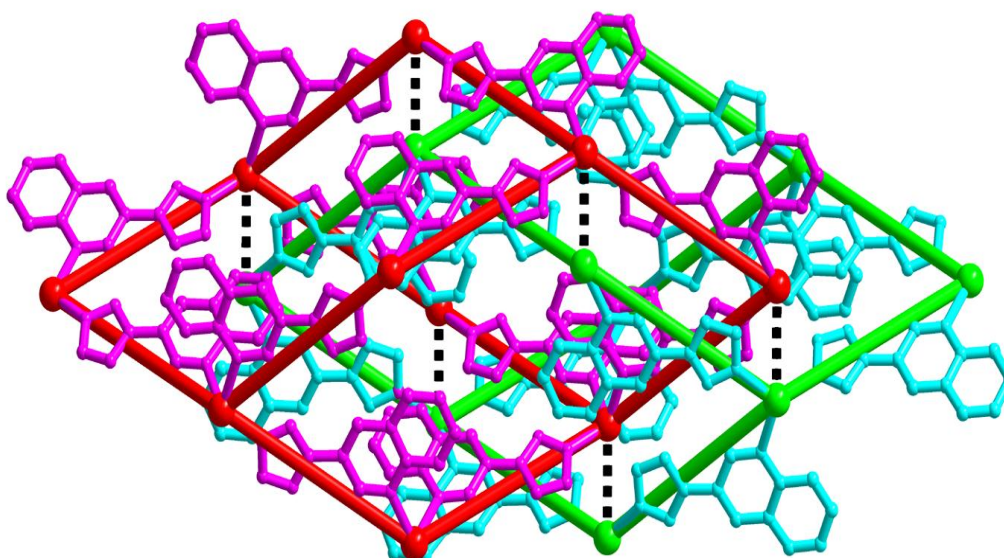

**Fig S1.** The strong interaction between Cd...Cd in compound **1**.

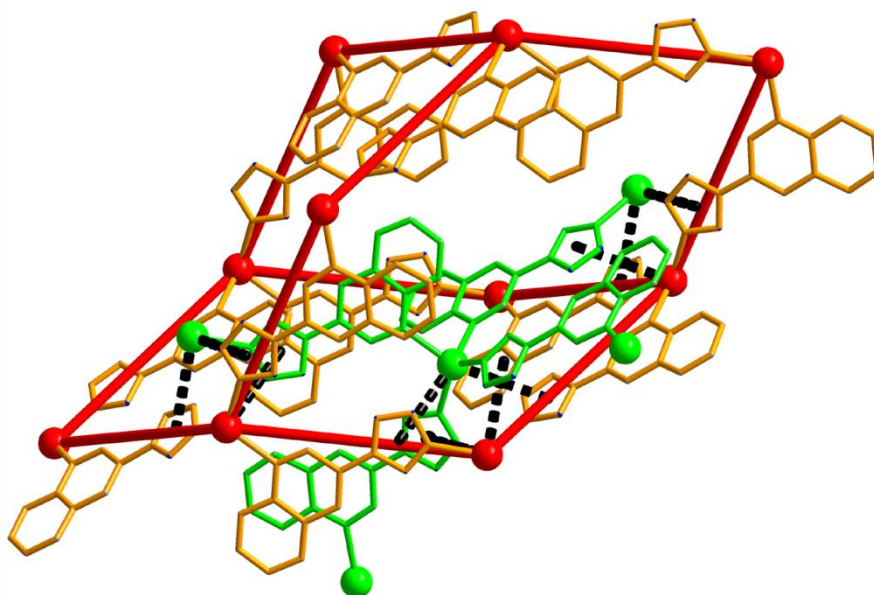

**Fig S2.** The cation... $\pi$  interaction between the Cd centers and tetrazole rings in compound **1**.

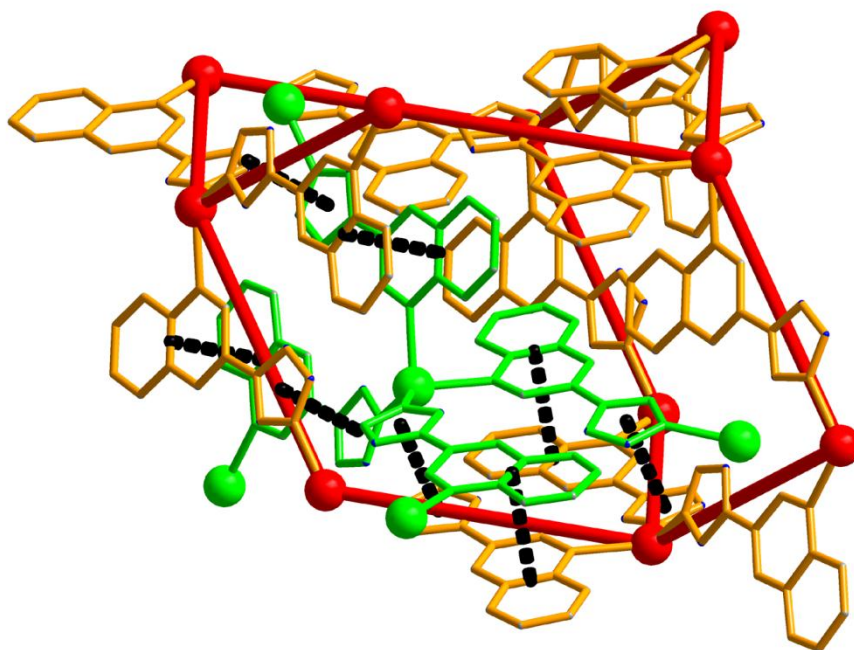

**Fig S3.** The  $\pi$ ... $\pi$  stacking between quinoline ring and tetrazole ring in compound **1**.

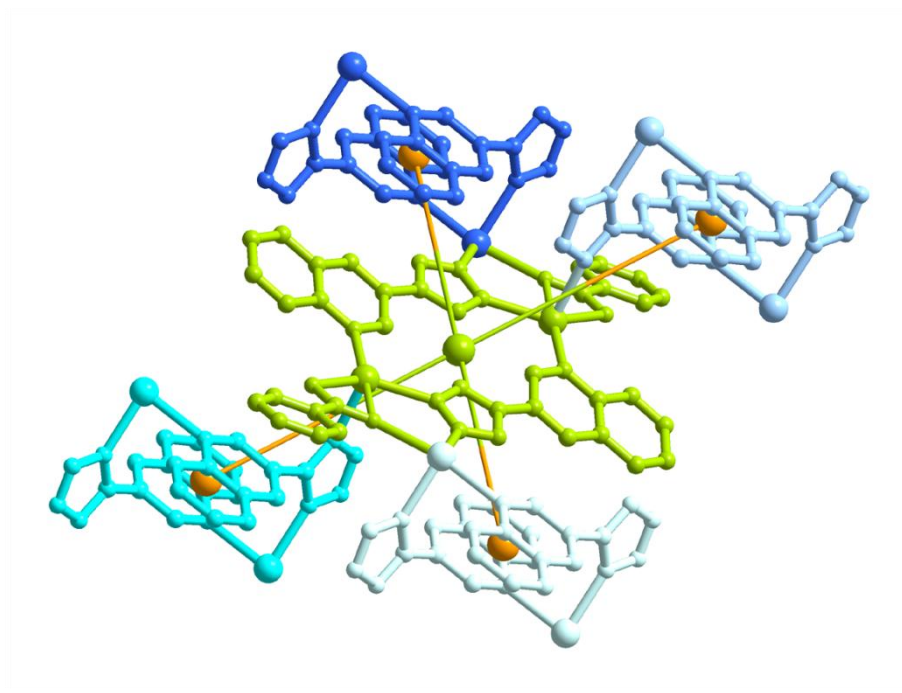

**Fig S4.** The four connected node simplified by  $\text{Cd}_4(\text{QTZ})_2(\text{IN})_2$  subunit (show in green) in compound **4**.

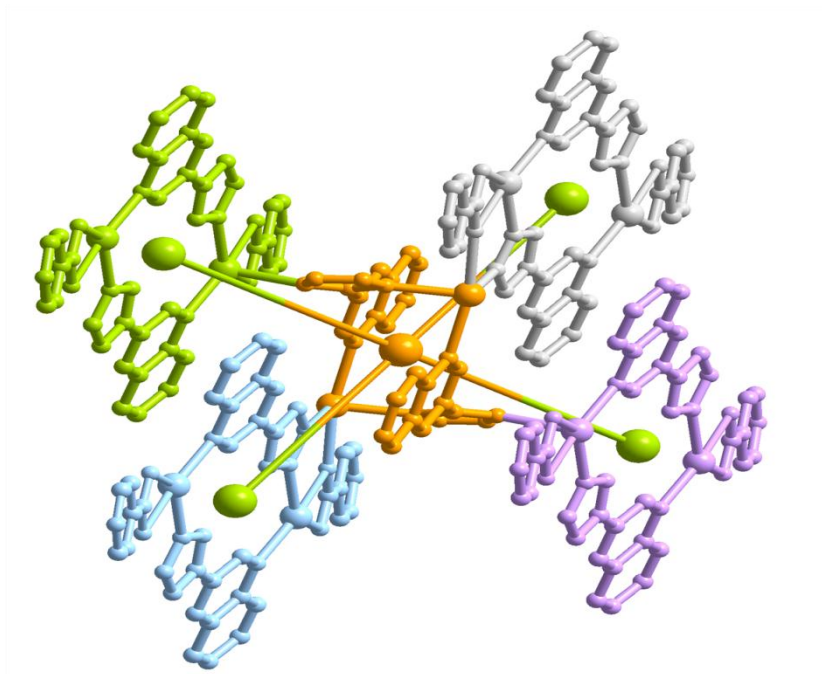

**Fig S5.** Another four connected node simplified by  $\text{Cd}_2(\text{QTZ})_2$  subunit (show in orange) in compound **4**.

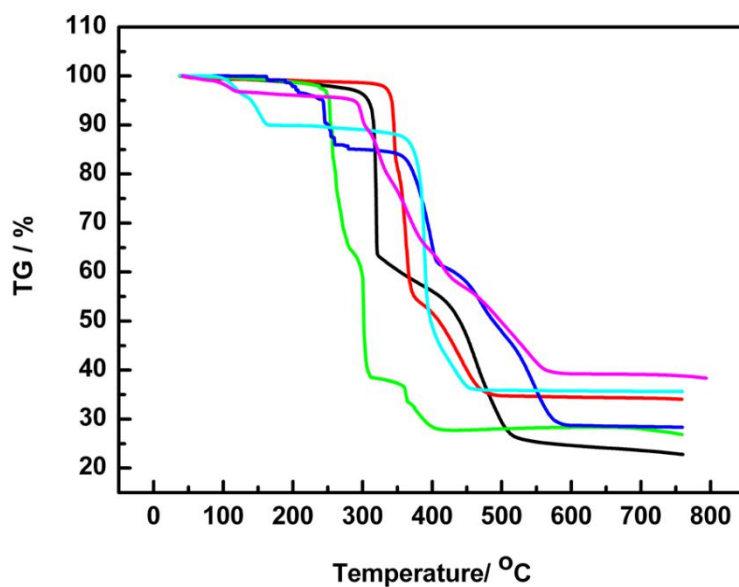

**Fig S6.** The TGA curves of compound **1** (black), compound **2** (red), compound **3** (green), compound **4** (blue), compound **5** (cyan), compound **6** (magenta).

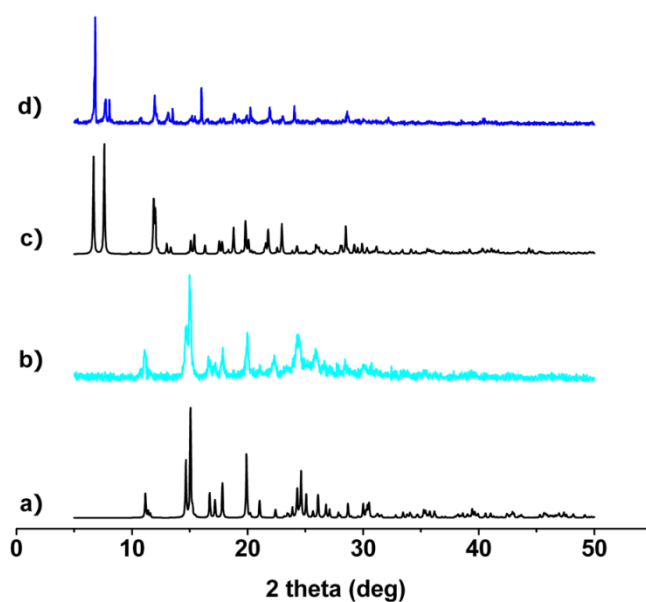

**Fig S7.** PXRD patterns (a) simulated based on the X-ray single-crystal diffraction data of **3**, (b) for as-synthesized **3**, (c) simulated based on X-ray single-crystal diffraction data of **4**, and (d) for as-synthesized **4**.

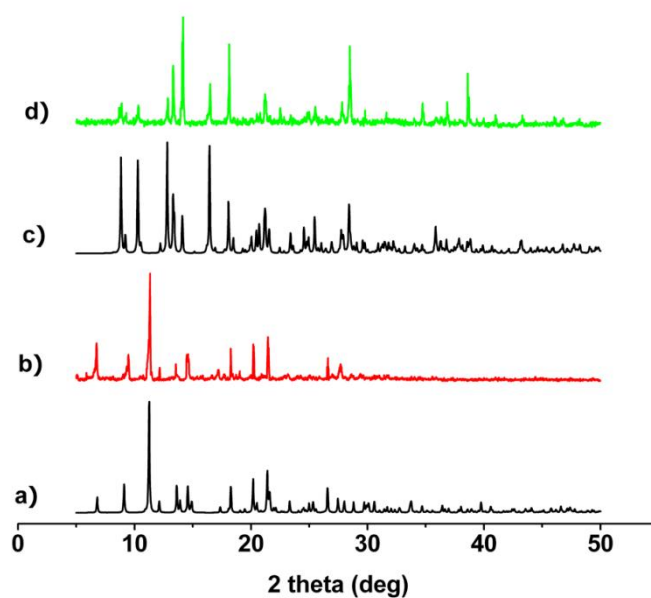

**Fig S8.** PXRD patterns (a) simulated based on the X-ray single-crystal diffraction data of **5**, (b) for as-synthesized **5**, (c) simulated based on X-ray single-crystal diffraction data of **6**, and (d) for as-synthesized **6**.

**Table S1.** Selected bond angles (°) for compounds **1-6**

| Compound <b>1</b> <sup>[a]</sup> |            |                      |            |
|----------------------------------|------------|----------------------|------------|
| N(4)#1-Cd(1)-N(4)#2              | 127.63(8)  | N(4)#1-Cd(1)-N(1)    | 110.79(6)  |
| N(4)#2-Cd(1)-N(1)#3              | 110.79(6)  | N(4)#2-Cd(1)-N(1)    | 106.36(6)  |
| N(1)-Cd(1)-N(1)#3                | 87.69(8)   | N(4)#1-Cd(1)-N(1)#3  | 106.36(6)  |
| Compound <b>2</b> <sup>[b]</sup> |            |                      |            |
| N(6)#1-Cd(1)-N(3)#3              | 84.26(9)   | N(6)#1-Cd(1)-O(1)    | 159.96(8)  |
| N(6)-Cd(1)-N(3)#3                | 157.21(10) | N(6)-Cd(1)-O(1)      | 80.83(9)   |
| N(4)#2-Cd(1)-N(3)#3              | 93.00(9)   | N(4)#2-Cd(1)-O(1)    | 96.55(9)   |
| O(1)-Cd(1)-N(3)#3                | 77.13(8)   | N(6)#1-Cd(1)-N(1)    | 87.00(9)   |
| N(1)-Cd(1)-N(3)#3                | 91.82(9)   | N(6)-Cd(1)-N(1)      | 92.48(9)   |
| N(6)#1-Cd(1)-N(6)                | 118.31(10) | N(4)#2-Cd(1)-N(1)    | 174.87(9)  |
| N(6)#1-Cd(1)-N(4)#2              | 91.72(9)   | O(1)-Cd(1)-N(1)      | 86.25(8)   |
| N(6)-Cd(1)-N(4)#2                | 83.75(9)   |                      |            |
| Compound <b>3</b> <sup>[c]</sup> |            |                      |            |
| N(3)#1-Zn(1)-Cl(1)               | 119.90(13) | N(3)#1-Zn(1)-N(5)#2  | 101.25(17) |
| N(5)#2-Zn(1)-Cl(1)               | 105.68(13) | N(3)#1-Zn(1)-N(1)    | 108.87(16) |
| N(1)-Zn(1)-Cl(1)                 | 112.67(14) | N(5)#2-Zn(1)-N(1)    | 107.06(16) |
| Compound <b>4</b> <sup>[d]</sup> |            |                      |            |
| N(10)#1-Cd(2)-N(8)               | 103.31(10) | N(11)#1-Cd(1)-N(3)#2 | 101.46(10) |
| O(1)-Cd(2)-N(8)                  | 118.62(10) | O(4)-Cd(1)-N(3)#2    | 93.46(11)  |
| N(10)#1-Cd(2)-N(7)#3             | 95.57(11)  | O(2)-Cd(1)-N(3)#2    | 169.21(10) |
| O(1)-Cd(2)-N(7)#3                | 88.30(10)  | N(4)-Cd(1)-O(3)      | 168.13(11) |
| N(8)-Cd(2)-N(7)#3                | 96.99(10)  | N(11)#1-Cd(1)-O(3)   | 82.14(11)  |
| N(10)#1-Cd(2)-N(2)#4             | 91.55(11)  | O(4)-Cd(1)-O(3)      | 54.65(11)  |
| O(1)-Cd(2)-N(2)#4                | 81.53(10)  | O(2)-Cd(1)-O(3)      | 100.11(12) |
| N(8)-Cd(2)-N(2)#4                | 88.41(11)  | N(3)#2-Cd(1)-O(3)    | 89.10(12)  |
| N(4)-Cd(1)-N(3)#2                | 85.51(10)  | N(10)#1-Cd(2)-O(1)   | 137.11(10) |
| N(4)-Cd(1)-N(11)#1               | 109.29(10) | N(7)#3-Cd(2)-N(2)#4  | 169.81(11) |
| N(4)-Cd(1)-O(4)                  | 115.07(11) | N(10)#1-Cd(2)-O(2)   | 83.23(10)  |
| N(11)#1-Cd(1)-O(4)               | 134.05(11) | O(1)-Cd(2)-O(2)      | 53.92(9)   |
| N(4)-Cd(1)-O(2)                  | 84.39(10)  | N(8)-Cd(2)-O(2)      | 168.32(10) |
| N(11)#1-Cd(1)-O(2)               | 85.49(10)  | N(7)#3-Cd(2)-O(2)    | 91.92(10)  |
| O(4)-Cd(1)-O(2)                  | 87.40(11)  | N(2)#4-Cd(2)-O(2)    | 81.68(11)  |
| Compound <b>5</b> <sup>[e]</sup> |            |                      |            |
| O(6)#3-Cd(2)-N(3)#4              | 119.67(10) | N(2)-Cd(1)-O(5)#2    | 85.86(11)  |
| O(4)-Cd(2)-N(3)#4                | 93.73(11)  | O(1W)-Cd(1)-O(5)#2   | 171.87(8)  |
| O(6)#3-Cd(2)-O(2W)               | 89.40(6)   | N(5)#1-Cd(1)-O(5)#2  | 101.03(11) |
| O(4)-Cd(2)-O(2W)                 | 89.87(10)  | O(2)-Cd(1)-O(1)      | 53.38(9)   |
| N(3)#4-Cd(2)-O(2W)               | 90.95(10)  | N(2)-Cd(1)-O(1)      | 82.78(10)  |
| O(6)#3-Cd(2)-O(1)#4              | 82.50(8)   | O(1W)-Cd(1)-O(1)     | 89.70(8)   |
| O(4)-Cd(2)-O(1)#4                | 102.01(11) | N(5)#1-Cd(1)-O(1)    | 173.72(10) |



|                           |            |                      |            |
|---------------------------|------------|----------------------|------------|
| N(3)#4-Cd(2)-O(1)#4       | 85.08(11)  | O(5)#2-Cd(1)-O(1)    | 82.21(9)   |
| O(2)-Cd(1)-O(5)#2         | 83.90(10)  | O(6)#3-Cd(2)-O(4)    | 146.60(8)  |
| O(2)-Cd(1)-N(2)           | 135.90(11) | O(2W)-Cd(2)-O(1)#4   | 167.68(8)  |
| O(2)-Cd(1)-O(1W)          | 91.88(9)   | O(6)#3-Cd(2)-O(3)    | 91.65(8)   |
| N(2)-Cd(1)-O(1W)          | 92.42(10)  | O(4)-Cd(2)-O(3)      | 55.02(10)  |
| O(2)-Cd(1)-N(5)#1         | 121.31(11) | N(3)#4-Cd(2)-O(3)    | 148.53(11) |
| N(2)-Cd(1)-N(5)#1         | 102.74(12) | O(2W)-Cd(2)-O(3)     | 92.44(10)  |
| O(1W)-Cd(1)-N(5)#1        | 87.10(10)  | O(1)#4-Cd(2)-O(3)    | 97.04(11)  |
| Compound 6 <sup>[a]</sup> |            |                      |            |
| N(5)#5-Cd(1)-O(2)         | 88.39(18)  | O(3)#2-Cd(2)-N(2)    | 82.34(13)  |
| O(1)-Cd(1)-O(2)           | 53.26(16)  | O(1W)#3-Cd(2)-N(2)#3 | 90.89(12)  |
| N(3)-Cd(1)-O(2)           | 89.9(2)    | O(1W)-Cd(2)-N(2)#3   | 174.15(13) |
| N(5)#5-Cd(1)-O(3)#2       | 134.36(14) | O(3)#4-Cd(2)-N(2)#3  | 82.34(13)  |
| O(1)-Cd(1)-O(3)#2         | 94.26(18)  | O(3)#2-Cd(2)-N(2)#3  | 90.20(15)  |
| N(3)-Cd(1)-O(3)#2         | 79.26(13)  | N(2)-Cd(2)-N(2)#3    | 91.19(19)  |
| O(2)-Cd(1)-O(3)#2         | 137.0(2)   | N(5)#5-Cd(1)-O(1)    | 124.8(2)   |
| N(5)#5-Cd(1)-O(4)#2       | 102.80(12) | N(5)#5-Cd(1)-N(3)    | 100.39(12) |
| O(1)-Cd(1)-O(4)#2         | 85.55(16)  | O(1)-Cd(1)-N(3)      | 115.4(2)   |
| O(1W)#3-Cd(2)-O(1W)       | 87.57(16)  | N(3)-Cd(1)-O(4)#2    | 129.97(12) |
| O(1W)#3-Cd(2)-O(3)#4      | 84.66(14)  | O(2)-Cd(1)-O(4)#2    | 134.11(17) |
| O(1W)-Cd(2)-O(3)#4        | 103.12(12) | O(3)#2-Cd(1)-O(4)#2  | 53.09(12)  |
| O(1W)#3-Cd(2)-O(3)#2      | 103.12(12) | N(5)#5-Cd(1)-C(16)#2 | 121.63(13) |
| O(1W)-Cd(2)-O(3)#2        | 84.66(14)  | O(1)-Cd(1)-C(16)#2   | 89.46(14)  |
| O(3)#4-Cd(2)-O(3)#2       | 169.4(2)   | N(3)-Cd(1)-C(16)#2   | 104.51(14) |
| O(1W)#3-Cd(2)-N(2)        | 174.15(13) | O(2)-Cd(1)-C(16)#2   | 142.43(14) |
| O(1W)-Cd(2)-N(2)          | 90.89(12)  | O(3)#2-Cd(1)-C(16)#2 | 26.14(13)  |
| O(3)#4-Cd(2)-N(2)         | 90.20(15)  | O(4)#2-Cd(1)-C(16)#2 | 26.96(12)  |

[a] #1:  $x-1/4, y-1/4, -z$ ; #2:  $-x+1/2, y-1/4, z+1/4$ ; #3:  $-x+1/4, y, -z+1/4$ ; #4:  $x+1/4, y+1/4, -z$ ;  
 [b] #1:  $x, -y+1/2, z-1/2$ ; #2:  $-x, y+1/2, -z+3/2$ ; #3:  $-x, -y, -z+1$ ; #4:  $-x, y-1/2, -z+3/2$ ; #5:  
 $x, -y+1/2, z+1/2$ ; [c] #1:  $x, -y+3/2, z+1/2$ ; #2:  $-x+1, -y+2, -z+2$ ; #3:  $x, -y+3/2, z-1/2$ ; [d] #1:  
 $-x+1, -y+2, -z$ ; #2:  $-x, -y+1, -z$ ; #3:  $-x+1, -y+1, -z$ ; #4:  $-x+1, -y+2, -z+1$ ; [e] #1:  
 $-x+1, -y+1, -z+1$ ; #2:  $-x+2, -y+1, -z$ ; #3:  $x, y-1, z$ ; #4:  $-x+2, -y, -z$ ; #5:  $x, y+1, z$ ; [f] #1:  
 $-x+1, y, -z-1/2$ ; #2:  $-x+1/2, -y+1/2, -z$ ; #3:  $-x+1, y, -z+1/2$ ; #4:  $x+1/2, -y+1/2, z+1/2$ ; #5:  
 $-x+1, -y, -z$ .

**Table S2.** Hydrogen bonds geometries (Å, °) for compounds **1-6**

| D—H...A                          | Distance<br>(D...A) | Angle<br>(D—H...A) | D—H...A              | Distance<br>(D...A) | Angle<br>(D—H...A) |
|----------------------------------|---------------------|--------------------|----------------------|---------------------|--------------------|
| <b>Compound 1</b> <sup>[a]</sup> |                     |                    |                      |                     |                    |
| C(1)-H(1)...N(2)                 | 2.913(2)            | 102                |                      |                     |                    |
| <b>Compound 2</b> <sup>[b]</sup> |                     |                    |                      |                     |                    |
| O(1)-H(1A)...N(2)#1              | 2.907(6)            | 123                | O(1)-H(1B)...N(5)#2  | 2.862(3)            | 173                |
| C(1)-H(1)...O(1)                 | 3.239(7)            | 127                |                      |                     |                    |
| <b>Compound 3</b> <sup>[c]</sup> |                     |                    |                      |                     |                    |
| C(1)-H(1)...N(2)                 | 2.805(6)            | 102                | C(1)-H(1)...N(2)#1   | 3.126(6)            | 148                |
| C(3)-H(3)...N(4)#2               | 3.462(6)            | 153                |                      |                     |                    |
| <b>Compound 4</b> <sup>[d]</sup> |                     |                    |                      |                     |                    |
| O1W-H1WA...O4                    | 2.846(14)           | 164                | O1W-H1WB...N1#1      | 3.021(16)           | 157                |
| C6-H6...O4                       | 3.189(7)            | 144                | C11-H11...O1#2       | 3.011(6)            | 123                |
| C15-H15...N12#3                  | 3.254(6)            | 156                | C18-H18...N1#4       | 3.393(8)            | 158                |
| C25-H25...N9                     | 2.921(5)            | 101                | C25-H25...N9#5       | 3.264(5)            | 145                |
| C27-H27...O1                     | 3.475(5)            | 165                | C28-H28...O3#6       | 3.332(7)            | 146                |
| C30-H30...N6#7                   | 3.397(7)            | 154                |                      |                     |                    |
| <b>Compound 5</b> <sup>[e]</sup> |                     |                    |                      |                     |                    |
| O(1W)-H(1A)..O(4W)               | 2.661(7)            | 163                | O(1W)-H(1B)...O(2)#1 | 2.753(5)            | 174                |
| O(2W)-H(2A)..O(5)#2              | 2.813(3)            | 163                | O(2W)-H(2B)..O(3W)#3 | 2.729(7)            | 174                |
| O(3W)-H(3A)...N(4)#4             | 2.928(2)            | 151                | O(3W)-H(3B)..O(3W)#5 | 3.160(7)            | 149                |
| O(4W)-H(4B)..O(6)#1              | 2.887(2)            | 119                |                      |                     |                    |
| <b>Compound 6</b> <sup>[f]</sup> |                     |                    |                      |                     |                    |
| O(1W)-H(1A)...O(2W)              | 2.798(9)            | 156                | O(1W)-H(1B)..O(1)#1  | 3.104(2)            | 164                |
| O(2W)-H(2A)..O(2W)#2             | 2.498(8)            | 133                | O(2W)-H(2B)..O(1W)   | 2.798(9)            | 141                |
| C(3)-H(3)...N(4)                 | 2.915(6)            | 100                | C(3)-H(3)...N(4)#3   | 3.236(6)            | 150                |
| C(5)-H(5)...O(4)#4               | 3.160(6)            | 153                | C(6)-H(6)...O(2) #5  | 3.291(9)            | 149                |
| C(13)-H(13)...O(2)               | 2.786(7)            | 100                | C(13)-H(13)..O(2)#6  | 2.786(7)            | 100                |

[b] #1: -x,-y,1-z; #2: -x,-y,2-z; [c] #1: 1-x,2-y,2-z; #2: 1-x,-1/2+y,3/2-z; [d] #1: 1-x,1-y,1-z; #2: 1-x,2-y,1-z; #3: -1+x,-1+y,z; #4: -1+x,y,-1+z; #5: 1-x,2-y,-z; #6: 1+x,y,z; #7: 1+x,1+y,z; [e] #1: 1-x,1-y,-z; #2: 2-x,-y,-1-z; #3: x,-1+y,-1+z; #4: x,1+y,z; #5: 2-x,2-y,1-z; [f] #1: 1/2-x,1/2-y,-z; #2: 3/2-x,1/2-y,-z; #3: 1-x,-y,-z; #4: 1/2+x,-1/2+y,z; #5: 2-x,-y,-z; #6: 1-x,y,-1/2-z.
